## 1 Title

2 Telomere-to-telomere assembly of the genome of an individual *Oikopleura*  
3 *dioica* from Okinawa using Nanopore-based sequencing

## 4 Authors

5 Aleksandra Bliznina<sup>1\*</sup>, Aki Masunaga<sup>1</sup>, Michael J. Mansfield<sup>1</sup>, Yongkai Tan<sup>1</sup>,  
6 Andrew W. Liu<sup>1</sup>, Charlotte West<sup>1,2</sup>, Tanmay Rustagi<sup>1</sup>, Hsiao-Chiao Chien<sup>1</sup>, Saurabh  
7 Kumar<sup>1</sup>, Julien Pichon<sup>1</sup>, Charles Plessy<sup>1\*</sup>, Nicholas M. Luscombe<sup>1,2,3</sup>

8 <sup>1</sup>Okinawa Institute of Science and Technology Graduate University, Genomics and  
9 Regulatory Systems Unit

10 <sup>2</sup>Francis Crick Institute

11 <sup>3</sup>UCL Genetics Institute, Department of Genetics, Evolution and Environment, University  
12 College London

13 \*Correspondence: [aleksandra.bliznina2@oist.jp](mailto:aleksandra.bliznina2@oist.jp); [charles.plessy@oist.jp](mailto:charles.plessy@oist.jp)

14

## 15 Abstract

### 16 Background

17 The larvacean *Oikopleura dioica* is an abundant tunicate plankton with the smallest (65-  
18 70 Mbp) non-parasitic, non-extremophile animal genome identified to date. Currently,  
19 there are two genomes available for the Bergen (OdB3) and Osaka (OSKA2016) *O. dioica*  
20 laboratory strains. Both assemblies have full genome coverage and high sequence  
21 accuracy. However, a chromosome-scale assembly has not yet been achieved.

### 22 Results

23 Here, we present a chromosome-scale genome assembly (OKI2018\_I69) of the  
24 Okinawan *O. dioica* produced using long-read Nanopore and short-read Illumina  
25 sequencing data from a single male, combined with Hi-C chromosomal conformation  
26 capture data for scaffolding. The OKI2018\_I69 assembly has a total length of 64.3 Mbp  
27 distributed among 19 scaffolds. 99% of the assembly is in five megabase-scale scaffolds.  
28 We found telomeres on both ends of the two largest scaffolds, which represent  
29 assemblies of two fully contiguous autosomal chromosomes. Each of the other three large  
30 scaffolds have telomeres at one end only and we propose that they correspond to sex  
31 chromosomes split into a pseudo-autosomal region and X-specific or Y-specific regions.  
32 Indeed, these five scaffolds mostly correspond to equivalent linkage groups of OdB3,  
33 suggesting overall agreement in chromosomal organization between the two populations.  
34 At a more detailed level, the OKI2018\_I69 assembly possesses similar genomic features  
35 in gene content and repetitive elements reported for OdB3. The Hi-C map suggests few

36 reciprocal interactions between chromosome arms. At the sequence level, multiple  
37 genomic features such as GC content and repetitive elements are distributed differently  
38 along the short and long arms of the same chromosome.

## 39 **Conclusions**

40 We show that a hybrid approach of integrating multiple sequencing technologies with  
41 chromosome conformation information results in an accurate *de novo* chromosome-scale  
42 assembly of *O. dioica*'s highly polymorphic genome. This assembly will be a useful  
43 resource for genome-wide comparative studies between *O. dioica* and other species, as  
44 well as studies of chromosomal evolution in this lineage.

45

## 46 **Keywords**

47 *Oikopleura dioica*, Oxford Nanopore sequencing, telomere-to-telomere, chromosome-  
48 scale assembly, single individual, Hi-C

49

## 50 **Background**

51 Larvaceans (synonym: appendicularians) are among the most abundant and ubiquitous  
52 taxonomic groups within animal plankton communities (Alldredge, 1976; Hopcroft and  
53 Roff, 1995). They live inside self-built "houses" which are used to trap food particles  
54 (Sato *et al.*, 2001). The animals regularly replace houses as filters become damaged or  
55 clogged and a proportion of discarded houses with trapped materials eventually sink to  
56 the ocean floor. As such larvaceans play a significant role in global vertical carbon flux  
57 (Alldredge, 2005).

58 *Oikopleura dioica* is the best documented species among larvaceans. It possesses  
59 several invaluable features as an experimental model organism. It is abundant in coastal  
60 waters and can be easily collected from the shore. Multigenerational culturing is possible  
61 (Masunaga *et al.*, 2020). It has a short lifecycle of 4 days at 23°C and remains free-  
62 swimming throughout its life (Feanux, 1998). As a member of the tunicates, a sister  
63 taxonomic group to vertebrates, *O. dioica* offers insights into their evolution (Delsuc *et*  
64 *al.*, 2006).

65 *O. dioica*'s genome size is 65-70 Mb (Seo *et al.*, 2001; Denoeud *et al.*, 2010), which is  
66 one of the smallest among all sequenced animals. Interestingly, genome sequencing of  
67 other larvacean species uncovered larger genome sizes, which correlated with the  
68 expansion of repeat families (Naville *et al.*, 2019). *O. dioica* is distinguished from other  
69 tunicates as it is the only reported dioecious species (Fredriksson and Olsson, 1991) and  
70 its sex determination system uses an X/Y pair of chromosomes (Denoeud *et al.*, 2010).  
71 The first published genome assembly of *O. dioica* (OdB3, B stands for Bergen) was  
72 performed with Sanger sequencing which allowed for high sequence accuracy but limited

73 coverage (Denoeud *et al.*, 2010). The Odb3 assembly was scaffolded with a physical  
74 map produced from BAC end sequences, which revealed two autosomal linkage groups  
75 and a sex chromosome with a long pseudo-autosomal region (PAR; Denoeud *et al.*  
76 *et al.*, 2010). Recently, a genome assembly for a mainland Japanese population of *O. dioica*  
77 (OSKA2016, OSKA denotes Osaka) was published, which displayed a high level of  
78 coding sequence divergence compared with the Odb3 reference (Wang *et al.*, 2015;  
79 Wang *et al.*, 2020). Although OSKA2016 was sequenced with single-molecule long reads  
80 produced with the PacBio RSII technology, it does not have chromosomal resolution.

81 Historical attempts at karyotyping *O. dioica* by traditional histochemical stains arrived at  
82 different chromosome counts, ranging between  $n = 3$  (Körner, 1952) and  $n = 8$   
83 (Colombera and Fernaux, 1973). In preparation for this study, we karyotyped the  
84 Okinawan *O. dioica* by staining centromeres with antibodies targeting phosphorylated  
85 histone H3 serine 28 (Liu *et al.*, 2020), and concluded a count of  $n = 3$ . This is also in  
86 agreement with the physical map of Odb3 (Denoeud *et al.*, 2010).

87 Currently, the method of choice for producing chromosome-scale sequences is to  
88 assemble contigs using long reads (~10 kb or more) produced by either the Oxford  
89 Nanopore or PacBio platforms, and to scaffold them using Hi-C contact maps (Lieberman-  
90 Aiden *et al.*, 2009; Dudchenko *et al.*, 2017). To date, there have been no studies of  
91 chromosome contacts in *Oikopleura* or any other larvaceans.

92 Here, we present a chromosome-length assembly of the Okinawan *O. dioica* genome  
93 sequence generated with datasets stemming from multiple genomic technologies and  
94 data types, namely long-read sequencing data from Oxford Nanopore, short-read  
95 sequences from Illumina and Hi-C chromosomal contact maps (Fig. 1).

96

## 97 **Results**

### 98 **Genome sequencing and assembly**

99 *O. dioica*'s genome is small and highly polymorphic (Denoeud *et al.*, 2010), making  
100 assembly of its complete sequence challenging. To reduce the level of variation, we  
101 sequenced genomic DNA from a single *O. dioica* male. A low amount of extracted DNA  
102 is an issue when working with small-size organisms like *O. dioica*. Therefore, we  
103 optimized the extraction and sequencing protocols to allow for low-template input DNA  
104 yields of around 200 ng and applied a hybrid sequencing approach using Oxford  
105 Nanopore reads to span repeat-rich regions and Illumina reads to correct individual  
106 nucleotide errors. The Nanopore run gave 8.2 million reads (221× coverage) with a  
107 median length of 840 bp and maximum length of 166 kb (Fig. 2A). Based on k-mer  
108 counting of the Illumina reads, the genome was estimated to contain ~50 Mbp (Fig. 2B)  
109 – comparable in size to the Odb3 and OSKA2016 assemblies – and a relatively high  
110 heterozygosity of ~3.6%. We used the Canu pipeline (Koren *et al.*, 2017) to correct, trim  
111 and assemble Nanopore reads, yielding a draft assembly comprising 175 contigs with a

112 weighted median N50 length of 3.2 Mbp. We corrected sequencing errors and local  
113 misassemblies of the draft contigs with Nanopore reads using Racon, and then with  
114 Illumina reads using Pilon. The initial Okinawa *O. dioica* assembly length was 99.3 Mbp,  
115 or ~1.5 times longer than the OdB3 genome at 70.4 Mbp. Merging haplotypes with  
116 HaploMerger2 resulted in two sub-assemblies (reference and allelic) of 64.3 Mbp with an  
117 N50 of 4.7 Mbp (I69-4). Repeating the procedure on a second individual from the same  
118 culture showed overall agreement in assembly lengths, sequences and structures  
119 (Fig. 2C).

120 To scaffold the genome, we sequenced Hi-C libraries from a pool of ~50 individuals from  
121 the same culture. More than 99% of the Hi-C reads could be mapped to the contig  
122 assembly. After removing duplicates, Hi-C contacts were passed to the 3D-DNA pipeline  
123 to correct major misassemblies, as well as order and orient the contigs. The resulting  
124 assembly named consisted of 8 megabase-scale scaffolds containing 99% of the total  
125 sequence (Fig. 3A), and 14 smaller scaffolds that account for the remaining 663 Kbp  
126 (lengths ranging from 2.9 to 131.6 Kbp). One of the small scaffolds is a draft assembly of  
127 mitochondrial genome that we discuss below. Most of the other smaller scaffolds are  
128 highly repetitive and might represent unplaced fragments of centromeric or telomeric  
129 regions. We annotated telomeres by searching for the TTAGGG repeat sequence and  
130 found that most of the megabase-scale scaffolds have single telomeric regions: therefore,  
131 we reasoned that they represent chromosome arms. Indeed, pairwise genome alignment  
132 to OdB3 identified two syntenic scaffolds for each autosomal linkage group, two for the  
133 pseudo-autosomal region (PAR) and one for each sex-specific region. Since we had  
134 previously inferred a karyotype of  $n = 3$  by immunohistochemistry (Liu *et al.*, 2020), we  
135 completed the assembly by pairing the megabase-scale scaffolds into chromosome arms  
136 based on their synteny with the OdB3 physical map (Fig. 3B). The final assembly named  
137 OKI2018\_I69 (Table 1; Suppl. Table 1) comprises telomere-to-telomere assemblies of  
138 the autosomal chromosomes 1 (chr 1) and 2 (chr 2). The sex chromosomes are split in  
139 pseudo-autosomal region (PAR) and X-specific region (XSR) or Y-specific region (YSR;  
140 Fig. 3). We assume that the sex-specific regions belong to the long arm of the PAR, as  
141 the long arm does not comprise any telomeric repeats (Fig. 4A).

142 **Table 1:** Comparison of the OKI2018\_I69 assembly with the previously published *O. dioica* genomes.

|                        | <b>OdB3</b>                        | <b>OSKA2016</b>                           | <b>OKI2018_I69</b>                     |
|------------------------|------------------------------------|-------------------------------------------|----------------------------------------|
| Geographical origin    | Bergen, Norway<br>(North Atlantic) | Osaka, Honshu, Japan<br>(Western Pacific) | Okinawa, Japan<br>(Ryukyu archipelago) |
| Assembly length (Mbp)  | 70.4                               | 65.6                                      | 64.3                                   |
| Number of scaffolds    | 1,260                              | 576                                       | 19                                     |
| Longest scaffold (Mbp) | 3.2                                | 6.8                                       | 17.1                                   |
| Scaffold N50 (Mbp)     | 0.4                                | 1.5                                       | 16.2                                   |
| Number of contigs      | 5,917                              | 746                                       | 42                                     |
| Contig N50 (Mbp)       | 0.02                               | 0.6                                       | 4.7                                    |
| GC content (%)         | 39.77                              | 41.34                                     | 41.06                                  |
| Gap rate (%)           | 5.589                              | 0.585                                     | 0.018                                  |
| Complete BUSCOs (%)    | 70.8                               | 71.7                                      | 73.6                                   |

143

144 The genome-wide contact matrix from the Hi-C data (Fig. 3C) shows bright, off-diagonal  
145 spots that suggest spatial clustering of the telomeres and centromeres both within the  
146 same and across different chromosomes (Dudchenko *et al.*, 2017). The three centromeric  
147 regions are outside the sex-specific regions, dividing the PAR and both autosomes into  
148 long and short arms. The two sex-specific regions have lower apparent contact  
149 frequencies compared with the rest of the assembly which is consistent with their haploid  
150 status in males. The chromosome arms themselves show few interactions between each  
151 other, even when they are part of the same chromosome.

## 152 **Chromosome-level features**

153 The genome contains between 1.4 and 2.6 Mbp of tandem repeats (detected using the  
154 tantan and ULTRA algorithms respectively with maximum period lengths of 100 and  
155 2,000). Subtelomeric regions tend to contain retrotransposons or tandem repeats with  
156 longer periods. We also found telomeric repeats in smaller scaffolds. A possible  
157 explanation is that subtelomeric regions display high heterozygosity, leading to duplicated  
158 regions that fail to assemble with the chromosomes. Alternatively, these scaffolds could  
159 be peri-centromeric regions containing interstitial telomeric sequences. In some species,  
160 high-copy tandem repeats can be utilized to discover the position of centromeric regions  
161 (Melters *et al.*, 2013). However, we could not find such regions. Additional experimental  
162 techniques such as chromatin immunoprecipitation and sequencing with centromeric  
163 markers might be necessary to resolve the centromeres precisely. Therefore, the current  
164 assembly skips over centromeric regions, represented as gaps of an arbitrary size of 500  
165 bp in the chromosomal scaffolds.

166 We studied genome-scale features by visualizing them along whole chromosomes, from  
167 the short to long arm, centered on their centromeric regions. Most strikingly, there is a  
168 clear difference in sequence content between chromosome arms (Fig. 4; Supp. Table 3).  
169 For each chromosome, small arms consistently display depleted GC content and elevated  
170 repetitive content compared with the same chromosome's long arm. Although GC content  
171 tends to be weakly negatively correlated with repeat content, it is difficult to ascertain  
172 whether repetitive elements tend to drive changes in GC content or if changes in GC  
173 content tend to drive the accumulation of repetitive sequence content. In either case, the  
174 mechanism behind the marked difference in sequence content between short and large  
175 chromosome arms remains unknown. It should be noted that the GC difference between  
176 short and long arms also has an effect on the availability of DpnII restriction enzyme  
177 recognition sites used for Hi-C library preparation, which recognizes the GC-rich motif  
178 /GATC, although this bias is likely insufficient to explain the low degree of intra-  
179 chromosomal interaction observed in the Hi-C contact maps.

## 180 **Quality assessment using BUSCO**

181 To assess the completeness of our assembly, we searched for 978 metazoan  
182 Benchmarking Universal Single-Copy Orthologs (BUSCOs) provided with the BUSCO  
183 tool (Simão *et al.*, 2015; Waterhouse *et al.*, 2017; Zdobnov *et al.*, 2017). To increase

184 sensitivity, we trained BUSCO's gene prediction tool, AUGUSTUS (Hoff and  
185 Stanke, 2019), with transcript models generated from RNA-Seq data collected from the  
186 same laboratory culture (see below). We detected 73.0% of BUSCOs (Table 1), which is  
187 similar to OdB3 and OSKA2016 (Fig. 5A; Suppl. Table 4). All detected BUSCOs except  
188 one reside on the chromosomal scaffolds. As the reported fraction of detected genes is  
189 lower than for other tunicates such as *Ciona intestinalis* HT (94.6%; Satou *et al.*, 2019)  
190 or *Botrylloides leachii* (89%; Blanchoud *et al.*, 2018), we searched for BUSCO genes in  
191 the transcriptomic training data (83.0% present) and confirmed the presence of all but  
192 one by aligning the transcript sequence to the genome. We then inspected the list of  
193 BUSCO genes that were found neither in the genome nor in the transcriptome.  
194 Bibliographic analysis confirmed that BUSCO genes related to the peroxisome were lost  
195 (Žárský and Tachezy, 2015; Kienle *et al.*, 2016). There are two possible explanations for  
196 the remaining missing genes: first is that protein sequence divergence (Berná *et al.*, 2012)  
197 or length reduction (Berná and Alvarez-Valin, 2015) in *Oikopleura* complicate detection  
198 by BUSCO, and second is gene loss. In line with the possibility of gene loss, most BUSCO  
199 genes missing from our assembly are also undetectable in OdB3 and OSKA2016 (Fig. B;  
200 Suppl. Table 5). To summarize, the Okinawa assembly achieved comparable detection  
201 of universal single-copy conserved orthologs in comparison to previous *O. dioica*  
202 assemblies, and consistently undetectable genes may be in fact missing or altered in  
203 *Oikopleura*.

## 204 **Repeat annotation**

205 In order to identify repetitive elements in the OKI2018\_I69 genome, we combined the  
206 results of several *de novo* repeat detection algorithms and used this custom library as an  
207 input to RepeatMasker to identify repeat sequences. Interspersed repeats make up  
208 14.39% of the assembly (9.25 Mbp; Fig. 6), comparable to the 15% reported for OdB3  
209 (Denoëud *et al.*, 2010). Of the annotated elements, the most abundant type is the long  
210 terminal repeats (LTRs; ~4.6%) with Ty3/gypsy *Oikopleura* transposons (TORs)  
211 dominating 2.97 Mbp of the sequence. Short interspersed nuclear elements (SINEs)  
212 make up a smaller portion of the OKI2018\_I69 sequence (<0.1%) compared with the  
213 OdB3 (0.62%). It has been suggested that SINEs contribute significantly to genome size  
214 variation in other oikopleurids (Naville *et al.*, 2019), but further analysis is required to  
215 determine whether that is the case at shorter evolutionary distances. Non-LTR LINE/Odin  
216 and Penelope-like elements are large components of most oikopleurid genomes  
217 (Naville *et al.*, 2019), but they are almost absent in the OKI2018\_I69 assembly. Indeed,  
218 44% of the Okinawa *O. dioica* predicted repeats could not be classified through searches  
219 against repeat databases and may either represent highly divergent relatives of known  
220 repeat classes, or else potentially represent novel repeats specific to Okinawan *O. dioica*.

## 221 **Gene annotation**

222 We annotated the OKI2018\_I69 assembly using *ab initio* and RNA-Seq-based gene  
223 predictions. The different predictions were refined and merged with EvidenceModeler  
224 using the Okinawan transcriptome and Bergen ESTs and proteins as additional support.

225 To predict alternative isoforms and update the models, we ran the PASA annotation  
226 pipeline that yielded 18,485 transcript isoforms distributed among 16,936 protein-coding  
227 genes. The number of predicted genes for the OKI2018\_I69 is lower than what was  
228 reported for Odb3 (18,020; Denoeud *et al.*, 2010) and OSKA2016 (18,743; Wang *et*  
229 *al.*, 2020). The rest of the genes are either lost from the Okinawan *O. dioica* genome or  
230 were not assembled and/or annotated with our pipeline. On the other side, higher number  
231 of genes might be artifact of the Odb3 and OSKA2016 annotations. The completeness of  
232 our annotation compares to the genome: BUSCO recovered 75.7% complete and 5.3%  
233 fragmented metazoan genes (Fig. 5A). Like in the Odb3 assembly, gene density is very  
234 high at one gene per 3.69 Kbp. Genes have very short introns (median length at 46 bp)  
235 and intergenic spaces (average length 1,206 bp) (Table 2). Therefore, overall genomic  
236 features seem to be conserved among *O. dioica* population despite large geographic  
237 distance.

238 **Table 2:** Overall characterization of the OKI2018\_I69 genome assembly

|                         | <b>OKI2018_I69</b> |
|-------------------------|--------------------|
| Repeats (%)             | 14.39              |
| Number of genes         | 16,936             |
| Number of isoforms      | 18,485             |
| Median gene length (bp) | 1,509              |
| Median exon length (bp) | 161                |
| Median intron length    | 46                 |

239

240 The ribosomal DNA gene encoding the precursor of the 18S, 5.8S and 28S rRNAs occurs  
241 as long tandem repeats that form specific chromatin domains in the nucleolus. We  
242 identified 4 full tandem copies of the rDNA gene at the tip of the PAR's short arm,  
243 separated by 8,738 bp (median distance). As this region has excess coverage of raw  
244 reads, and since assemblies of tandem repeats are limited by the read length (99% of  
245 Nanopore reads in our data are shorter than 42,842 bp), we estimate that the real number  
246 of the tandem rDNA copies could range between 5 (MiSeq) and 25 times (Nanopore)  
247 larger. Between or flanking the rDNA genes, we also found short tandem repeats made  
248 of 2 to 3 copies of a 96-bp sequence. This tandem repeat is unique to the rDNA genes  
249 and to our reference and draft genomes, and was not found in the Odb3 reference nor in  
250 other larvacean genomes. The 5S rRNA is transcribed from loci distinct to the rDNA gene  
251 tandem arrays. In *Oikopleura*, it has the particularity of being frequently associated with  
252 the spliced leader (SL) gene and to form inverted repeats present in more than 40 copies  
253 (Ganot *et al.*, 2004). We found 27 copies of these genes on every chromosomal scaffold  
254 except YSR, 22 of which were arranged in inverted tandem repeats. Altogether, we found  
255 in our reference genome one rDNA gene repeat region assembled at the end of a  
256 chromosome short arm. This sequence might provide useful markers for phylogenetic  
257 studies in the future.

258

259

## 260 **Draft mitochondrial genome scaffold**

261 We identified a draft mitochondrial genome among the smaller scaffolds, chrUn\_12, by  
262 searching for mitochondrial sequences using the Cox1 protein sequence and the ascidian  
263 mitochondrial genetic code (Pichon *et al.*, 2019). Automated annotation of this scaffold  
264 using the MITOS2 server detected the coding genes *cob*, *cox1*, *nad1*, *cox3*, *nad4*, *cox2*,  
265 and *atp6* (Fig. 7A), which are the same as in Denoeud *et al.*, 2010 except for the *nd5*  
266 gene that is missing from our assembly. The open reading frames are often interrupted  
267 by T-rich regions, in line with Denoeud *et al.* (2010). However, we cannot rule out the  
268 possibility that these regions represent sequencing errors, as homopolymers are difficult  
269 to resolve with the Nanopore technology available in 2019. The *cob* gene is interrupted  
270 by a long non-coding region, but this might be a missassembly. Indeed, an independent  
271 assembly using the f1ye software (Kolmogorov *et al.*, 2019) with the --meta option to  
272 account for differential coverage also produced a draft mitochondrial genome, but its non-  
273 coding region was ~2 kbp longer. Moreover, a wordmatch dotplot shows tandem repeats  
274 in this region (Fig. 7B), and thus this region is prone to assembly errors, especially with  
275 respect to the number of repeats. Altogether, the draft contig produced in our assembly  
276 shows as a proof of principle that sequencing reads covering the mitochondrial genome  
277 alongside the nuclear genome can be produced from a single individual, although it may  
278 need supporting data such as targeted resequencing in order to be properly assembled.

279

## 280 **Discussion**

### 281 **OKI2018\_I69 assembly quality**

282 Previously, different techniques have been used to sequence and assemble *O. dioica*  
283 genomes which have produced assemblies of varying quality. The Sanger-based OdB3  
284 sequence was published in 2010 (Denoeud *et al.*, 2010). Due to limitations in sequencing  
285 technologies at the time, it is highly fragmented, comprising 1,260 scaffolds with an N50  
286 of 0.4 Mbp. The recently released OSKA2016 assembly was generated from long-read  
287 PacBio data and, therefore, has a larger N50 and fewer scaffolds (Table 1, Wang *et al.*  
288 2020). Both assemblies have high sequence quality and nearly full genome coverage,  
289 but neither of them contains resolved chromosomes. However, Denoeud *et al.* (2010)  
290 released a physical map calculated for OdB3 from BAC end sequences that comprises  
291 five linkage groups (LGs): two autosomal LGs, one pseudo-autosomal region of sex  
292 chromosomes, and two sex specific regions (X and Y).

293 The use of reference chromosome information from a closely related species to order  
294 contigs or scaffolds into chromosome-length sequences is a common way to generate  
295 final genome assemblies (*Drosophila* 12 Genomes Consortium, 2007). However, this  
296 approach precludes discovery of structural variances. In our study, we first assembled  
297 long Nanopore reads *de novo* into contigs that we ordered and joined into megabase-  
298 scale scaffolds using long-range Hi-C data. The synteny-based approach with OdB3's



299 linkage groups as a reference was only required to guide final pairing of chromosome  
300 arms into single scaffolds of chr 1, chr 2 and PAR, as we found that these scaffolds mostly  
301 align to one of the autosomal LGs or PAR. Therefore, any potential assembly errors in  
302 OdB3 would not be transferred to our assembly. Apart from these syntenic relationships,  
303 our karyotyping results and the count of three centromeres on the Hi-C contact map  
304 supports the presence of three pairs of chromosomes in the Okinawan *O. dioica*.  
305 However, there is a possibility that chromosome arms might have been exchanged  
306 between chromosomes in the Okinawan population. Additional experimental evidence is  
307 needed to confirm the pairing of chromosome arms, such as data generated by the Omni-  
308 C method which does not rely on restriction enzyme fragmentation.

309 Our synteny-based scaffolding assumes that animals collected from the Atlantic and  
310 Pacific oceans are from the same species and conserve these chromosomal properties.  
311 However, there are visible differences in gene number and repeat content compared with  
312 the OdB3 and OSKA2016. *O. dioica* is distributed all over the world, and all the  
313 populations are classified as a single species owing to the lack of obvious morphological  
314 differences and limited understanding of population structure. However, the short life span  
315 of *O. dioica* combined with limited mobility and high mutation rate contribute to an  
316 accelerated genome evolution that might have led to multiple speciation events.  
317 Sequence polymorphism was previously noted when comparing the OdB3 genome to  
318 genomic libraries of a laboratory strain collected on the North American Pacific coast  
319 (Denoëud *et al.*, 2010), and more recently when comparing OdB3 to OSKA2010 (Wang *et al.*,  
320 2015; Wang *et al.*, 2020). Further work will be needed to elucidate the relation of the  
321 Okinawan population to the North Atlantic and North Pacific ones.

## 322 **Inter-arm contacts**

323 The sequence of *O. dioica*'s chromosomes and their contact map suggest that  
324 chromosome arms may be the fundamental unit of synteny in larvaceans. Hi-C contact  
325 matrices in vertebrates typically display greater intra-chromosomal than inter-  
326 chromosomal interactions. A similar pattern was reported in the tunicate *Ciona robusta*  
327 (also known as *intestinalis* type A; Satou *et al.*, 2019) and the lancelet *Branchiostoma*  
328 *floridae* (Simakov, Marlétaz, *et al.*, 2020). By comparison, in flies and mosquitoes, the  
329 degree of contacts between two arms of the same chromosome appear to be reduced  
330 but nonetheless more frequent than between different chromosomes (Dudchenko *et al.*,  
331 2017). Indeed, in *Drosophila*, the chromosome arms – which are termed Muller  
332 elements owing to studies with classical genetics (Schaeffer, 2018) – are frequently  
333 exchanged between chromosomes across speciation events. *O. dioica*'s genome shares  
334 with fruit flies its small size and small number of chromosomes. However, small  
335 chromosome size is also seen in the tunicate *Ciona robusta*, which has 14 meta- or sub-  
336 meta-centric pairs (Shoguchi *et al.*, 2005), with an average length of ~8 Mbp (Satou *et al.*,  
337 2019) that exhibit a more extensive degree of contacts, particularly for intra-  
338 chromosomal interactions across the centromeres (Satou *et al.*, 2019). As we prepared  
339 our Hi-C libraries from adult animals, where polyploidy is high (Ganot and Thompson,

340 2002), we cannot rule out that it could be a possible cause of the low inter-arm interactions  
341 in our contact matrix. Further studies such as investigations of other developmental  
342 stages will be needed to elucidate the mechanism at work for the similarity between  
343 *O. dioica* and insect's chromosome contact maps.

## 344 **Visualization and access**

345 We prepared a public view of our reference genome in the ZENBU browser (Severin *et*  
346 *al.*, 2014), displaying tracks for our gene models, *in silico*-predicted features such as  
347 repeats and non-coding RNAs, or syntenies with other *Oikopleura* genomes. To facilitate  
348 the study of known genes, we screened the literature for published sequences  
349 (Suppl. Table 6) and mapped them to the genome with a translated alignment. The  
350 ZENBU track for these alignments is searchable by gene name, accession number and  
351 PubMed identifier. Chromosome-level visualization of this track shows that the genes  
352 studied so far are distributed evenly on each chromosome, except for the repeat-rich YSR  
353 (Figure 8). In line with the observed loss of synteny in the Hox genes noted in *Oikopleura*  
354 (Seo *et al.*, 2004), we did not see apparent clustering of genes by function or relatedness.  
355 The view of the OKI2018\_I69 genome assembly can be found here:

356 [https://fantom.gsc.riken.jp/zenbu/gLyphs/#config=nPfav\\_juDdOmlG2t4LkJ1D;loc=OKI2](https://fantom.gsc.riken.jp/zenbu/gLyphs/#config=nPfav_juDdOmlG2t4LkJ1D;loc=OKI2018_I69_1.0::chr1:1..100000+)  
357 [018\\_I69\\_1.0::chr1:1..100000+](https://fantom.gsc.riken.jp/zenbu/gLyphs/#config=nPfav_juDdOmlG2t4LkJ1D;loc=OKI2018_I69_1.0::chr1:1..100000+).

358

## 359 **Conclusions**

360 We demonstrated that a combination of long- and short-read sequencing data from a  
361 single animal, together with the long-range Hi-C data and the use of various bioinformatic  
362 approaches can result in a high-quality *de novo* chromosome-scale assembly of  
363 *O. dioica*'s highly polymorphic genome. However, further work is needed to properly  
364 resolve the polymorphisms into separated haplotypes using a different approach, such as  
365 trio-binning. We believe that the current version of the assembly will serve as an essential  
366 resource for a broad range of biological studies, including genome-wide comparative  
367 studies of *Oikopleura* and other species, and provides insights into chromosomal  
368 evolution.

369

## 370 **Methods**

### 371 ***Oikopleura* sample and culture**

372 Wild live specimens were collected from Ishikawa Harbor (26°25'39.3"N 127°49'56.6"E)  
373 by a hand-held plankton net and returned to the lab for culturing (Masunaga *et al.*, 2020).  
374 A typical generation time from hatchling to fully mature adult is 4 days at 23°C for the  
375 Okinawan *O. dioica*. Individuals I28 and I69 were collected at generation 44 and 47,  
376 respectively.

## 377 **Isolation and sequencing of DNA**

378 Staged fully mature males were collected prior to spawning. These were each washed  
379 with 5 ml filtered autoclaved seawater (FASW) for 10 min three times before resuspension  
380 in 50  $\mu$ l 4 M guanidium isothiocyanate, 0.5% SDS, 50 mM sodium citrate and 0.05% v/v  
381 2-mercaptoethanol. This was left on ice for 30 min before being precipitated with 2  
382 volumes of ice-cold ethanol and centrifuged at 14,000 rpm 4°C for 20 min. The pellet was  
383 washed with 1 ml of 70% cold-ethanol, centrifuged at 14,000 rpm 4°C for 5 min and air  
384 dried briefly before resuspension in 200  $\mu$ l 100 mM NaCl, 25 mM EDTA, 0.5% SDS and  
385 10  $\mu$ g/ml proteinase K. The lysates were incubated overnight at 50°C. The next morning,  
386 the total nucleic acids were first extracted and then back-extracted once more with  
387 chloroform:phenol (1:1). Organic and aqueous phases were resolved by centrifugation at  
388 13,000 rpm for 5 min for each extraction; both first and back-extracted aqueous phases  
389 were collected and pooled. The pooled aqueous phase was subjected to a final extraction  
390 with chloroform and spun down as previously described. The aqueous fraction was then  
391 removed and precipitated by centrifugation with two volumes of cold ethanol and 10  $\mu$ g/ml  
392 glycogen; washed with 1 ml of cold 70% ethanol and centrifuged once more as previously  
393 described. The resulting pellet was allowed to air-dry for 5 min and finally resuspended in  
394 molecular biology grade H<sub>2</sub>O for quantitation using a Qubit 3 Fluorometer (Thermo Fisher  
395 Scientific, Q32850), and the integrity of the genomic DNA was validated using Agilent  
396 4200 TapeStation (Agilent, 5067-5365).

397 Isolated genomic DNA used for long-reads on Nanopore MinION platform were  
398 processed with the Ligation Sequencing Kit (Nanopore LSK109) according to  
399 manufacturer's protocol, loading approximately 200 ng total sample per R9.4 flow-cell.  
400 Raw signals were converted to sequence files with the Guppy proprietary software (model  
401 "template\_r9.4.1\_450bps\_large\_flipflop", version 2.3.5). Approximately 5 ng was set  
402 aside for whole genome amplification to perform sequencing on Illumina MiSeq platform,  
403 using the TruePrime WGA Kit (Sygnis, 370025) according to manufacturer's protocol.  
404 Magnetic bead purification (Promega, NG2001) was employed for all changes in buffer  
405 conditions required for enzymatic reactions and for final buffer suitable for sequencing  
406 system. Approximately 1  $\mu$ g of amplified DNA was sequenced by our core sequencing  
407 facility with a 600-cycle MiSeq Reagent Kit v3 (Illumina, MS-102-3003) following the  
408 manufacturer's instructions. These Illumina runs were used for polishing and error  
409 checking of Nanopore runs.

## 410 **Hi-C library preparation**

411 50 fully matured males were rinsed 3 times for 10 min each by transferring from well to  
412 well in a 6-well plate filled with 5 ml FASW. Rinsed animals were combined in a 1.5 ml  
413 microcentrifuge tube. Tissues were pelleted for 10 min at 12,000 rpm and leftover FASW  
414 was discarded. A Hi-C library was then prepared by following the manufacturer's protocol  
415 (Dovetail, 21004). Briefly, tissues were cross-linked for 20 min by adding 1 ml 1 $\times$  PBS  
416 and 40.5  $\mu$ l 37% formaldehyde to the pellet. The tubes were kept rotating to avoid tissue  
417 settle during incubation. Cross-linked DNA was then blunt-end digested with DpnII

418 (Dovetail) to prepare ends for ligation. After ligation, crosslinks were reversed, DNA was  
419 purified by AMPure XP Beads (Beckman, A63880) and quantified by Qubit 3 Fluorometer  
420 (Thermo Fisher Scientific, Q10210). The purified DNA was sheared to a size of 250-450  
421 bp by sonication using a Covaris M220 instrument (Covaris, Woburn, MA) with peak  
422 power 50 W, duty factor 20, and cycles/burst 200 times for 65 s. DNA end repair, adapter  
423 ligation, PCR enrichment, and size selection were carried out by using reagents provided  
424 with the kit (Dovetail, 21004). Finally, the library was checked for quality and quantity on  
425 an Agilent 4200 TapeStation (Agilent, 5067-5584) and a Qubit 3 Fluorometer. The library  
426 was sequenced on a MiSeq (Illumina, SY-410-1003) platform using a 300 cycles V2  
427 sequencing kit (Illumina, MS-102-2002), yielding 20,832,357 read pairs.

#### 428 **Genome size estimation**

429 Jellyfish (Marçais, Kingsford, 2011) was used to generate k-mer count profiles for various  
430 values of  $k$  (17, 21, 25, 29, 33, 37, and 41) based on the genome-polishing Illumina MiSeq  
431 reads, with a maximum k-mer count of 1000. These k-mer profiles were subsequently  
432 used to estimate heterozygosity and genome size parameters using the GenomeScope  
433 web server (<http://qb.cshl.edu/genomescope/>).

#### 434 **Filtering of Illumina MiSeq raw reads**

435 Before using at different steps, all raw Illumina reads were quality-filtered (-q 30, -p 70)  
436 and trimmed on both ends with the FASTX-Toolkit v0.0.14  
437 ([http://hannonlab.cshl.edu/fastx\\_toolkit/index.html](http://hannonlab.cshl.edu/fastx_toolkit/index.html)). The quality of the reads before and  
438 after filtering were checked with FASTQC v0.11.5 (Andrews *et al.*, 2010). Read pairs that  
439 lacked one of the reads after the filtering were discarded in order to preserve paired-end  
440 information.

#### 441 **Genome assembly**

442 Genome assembly was conducted with the Canu pipeline v1.8 (Koren *et al.*, 2017) and  
443 32.3 Gb (~221.69×) raw Nanopore reads (correctedErrorRate=0.105,  
444 minReadLength=1000). The resulting contig assembly was polished three times with  
445 Racon v1.2.1 (Vaser *et al.*, 2017) using Canu-filtered Nanopore reads. Nanopore-specific  
446 errors were corrected with Pilon v1.22 (Walker *et al.*, 2014) using filtered 150-bp paired-  
447 end Illumina reads (~99.7×). Illumina reads were aligned to the Canu contig assembly  
448 with BWA v0.7.17 (Li *et al.*, 2013) and the corresponding alignments were provided as  
449 input to Pilon. Next, one round of the HaploMerger2 processing pipeline (Huang *et*  
450 *al.*, 2017) was applied to eliminate redundancy in contigs and to merge haplotypes.

451 Contigs were joined into scaffolds based on long-range Hi-C Dovetail™ data using Juicer  
452 v1.6 (Durand *et al.*, 2016) and 3D de novo assembly (3D-DNA; Dudchenko *et al.*, 2017)  
453 pipelines. The megabase-scale scaffolds were joined into pairs of chromosome arms  
454 based on their synteny with the OdB3 physical map (see below). The candidate assembly  
455 was visualized and reviewed with Juicebox Assembly Tools (JBAT) v1.11.08  
456 (<https://github.com/aidenlab/Juicebox>; Durand and Robinson 2016).

457 Whole-genome alignment between OKI2018\_I69 and OdB3 assemblies was performed  
458 using LAST v1066 (Kielbasa *et al.*, 2011). The sequence of OdB3 linkage groups were  
459 reconstructed as defined in the Supplementary Figure 2 in Denoeud *et al.* 2010. The  
460 resulting alignments were post-processed in R with a custom script  
461 (<https://github.com/oist/oikGenomePaper>) and visualized using the R package  
462 “networkD3” (“sankeyNetwork” function). The color scheme for chromosomes was  
463 adopted from R Package RColourBrewer, “Set2”.

464 The final assembly was checked for contamination by BLAST searches against the NCBI  
465 non-redundant sequence database. 12 smaller scaffolds were found to have strong  
466 matches to bacterial DNA (Suppl. Table 2), as well as possessing significantly higher  
467 Nanopore sequence coverage (>500×) than the rest of the assembly, and were therefore  
468 removed from the final assembly.

469 The completeness and quality of the assembly were checked with QUAST v5.0.2  
470 (Gurevich *et al.*, 2013) and by searching for the set of 978 highly conserved metazoan  
471 genes (OrthoDB version 9.1; Zdobnov *et al.*, 2017) using BUSCO v3.0.2 (Simão *et al.*,  
472 2015; Waterhouse *et al.*, 2017). The --sp option was set to match custom AUGUSTUS  
473 parameters (Hoff and Stanke, 2019) trained using the Trinity transcriptome assembly (see  
474 below) split 50% / 50% for training and testing.

#### 475 **Repeat masking and transposable elements**

476 A custom library of repetitive elements (RE) present in the genome assembly was built  
477 with RepeatModeler v2.0.1 that uses three *de novo* -repeat finding programs: RECON  
478 v1.08, RepeatScout v1.0.6 and LtrHarvest/Ltr\_retriever v2.8. In addition, MITE-Hunter  
479 v11-2011 (Han and Wessler, 2010) and SINE\_Finder (Wenke and Torsten, *et al.*, 2011)  
480 were used to search for MITE and SINE elements, respectively. The three libraries were  
481 pooled together as input to RepeatMasker v4.1.0 (Smit, Hubley and Green, 2015) to  
482 annotate and soft-mask these repeats in the genomic sequence. Resulting sets of REs  
483 were annotated by BLAST searches against RepeatMasker databases and sequences of  
484 transposable elements published for different oikopleurids (Naville *et al.*, 2019).

485 Tandem repeats were detected using two different programs, tantan (Frith, 2011) and  
486 ULTRA (Olson and Wheeler, 2018) using two different maximal period lengths (100 and  
487 2000). Version 23 of tantan was used with the parameters -f4 (output repeats) and -w100  
488 or 2000 (maximum period length). ULTRA version 0.99.17 was used with -mu 2 (minimum  
489 number of repeats) -p 100 or 2000 (maximum period length) and -mi 5 -md 5 (maximum  
490 consecutive insertions or deletions). ULTRA detected more tandem repeats than tantan,  
491 but its predictions include more than 90% of tantan’s. Both tools detected *O. dioica*’s  
492 telomeric tandem repeat sequence, which is TTAGGG as in other chordates  
493 (Schulmeister *et al.*, 2007).

494

495 **Developmental staging, isolation and sequencing of mRNA, transcriptome**  
496 **assembly**

497 Mixed stage embryos, immature adults (3 days after hatching) and adults (4 days after  
498 hatching) were collected separately from our on-going laboratory culture for RNA-Seq  
499 analysis. Eggs were washed three times for 10 min by moving eggs along with  
500 micropipette from well to well in a 6-well dish each containing 5 ml of FASW and left in a  
501 fresh well of 5 ml FASW in the same dish. These were stored at 17°C and set aside for  
502 fertilization. Matured males, engorged with sperm, were also washed 3 times in FASW.  
503 Still intact mature males were placed in 100 µl of fresh FASW and allowed to spawn  
504 naturally. Staged embryos were initiated by gently mixing 10 µl of the spawned male  
505 sperm to the awaiting eggs in FASW at 23°C. Generation 30 developing embryos at 1 h  
506 and 3 h post-fertilization were visually verified by dissecting microscope and collected as  
507 a pool for the mixed staged embryo time point. Immature adults at generation 31 and  
508 sexually differentiated adults at generation 30 were used for the 2 adult staged time  
509 points. All individuals for each time point were pooled and washed with FASW three times  
510 for 10 min. Total RNA was extracted and isolated with RNeasy Micro Kit (Qiagen, 74004)  
511 and quantitated using Qubit 3 Fluorometer (Thermo Fisher Scientific, Q10210). Additional  
512 quality control and integrity of isolated total RNA was checked using Agilent 4200  
513 TapeStation (Agilent, 5067-5576). Further processing for mRNA selection was performed  
514 with Oligo-d(T)25 Magnetic Beads (NEB, E7490) and the integrity of the RNA was  
515 validated once more with Agilent 4200 TapeStation (Agilent, 5067-5579). Adapters for the  
516 creation of DNA libraries for the Illumina platform were added per manufacturer's  
517 guidance (NEB, E7805) as were unique indexed oligonucleotides (NEB, E7600) to each  
518 of the 3 staged samples. Each cDNA library was sequenced paired-end with a 300-cycle  
519 MiSeq Reagent Kit v2 (Illumina, MS-102-2002) loaded at approximately 12 pM.

520 After quality assessment and data filtering (see Filtering of Illumina MiSeq raw reads),  
521 Illumina RNA-Seq reads were pooled together and *de novo* assembled with Trinity v2.8.2  
522 (Grabherr *et al.*, 2011). Redundancy in the transcriptome assembly was removed by CD-  
523 HIT v4.8.1 (Li and Godzik, 2006) with a cut-off value of 95% identity. The quality and  
524 completeness of the transcriptome assembly was verified with rnaQUAST v1.5.1  
525 (Bushmanova *et al.*, 2016) and BUSCO.

526 **Gene prediction and annotation**

527 Gene models were predicted using both AUGUSTUS v3.3 (Stanke *et al.* 2006) and the  
528 MAKER pipeline v3.01.03 (Cantarel *et al.*, 2008). AUGUSTUS was trained following the  
529 Hoff and Stanke protocol (2019) with the initial RNA-Seq reads and transcriptome  
530 assembly used as intron and exon hints, correspondingly. Transcript models were  
531 generated with the PASA pipeline v20140417 (Haas *et al.*, 2003) using BLAT v36 and  
532 GMAP v2018-02-12 to align transcripts to the genome. RNA-Seq reads were mapped to  
533 the genome with STAR v2.0.6a (Dobin *et al.*, 2013). Running AUGUSTUS in *ab initio*  
534 mode resulted in 14,327 genes, whereas prediction with hints resulted in 17,277 genes.

535 ESTs and proteins from the Bergen *O. dioica* and our transcriptome assembly were used  
536 as evidence to run the MAKER pipeline (<https://reslp.github.io/blog/My-MAKER-Pipeline/>)  
537 that resulted in a set of 17,480 predicted genes. To finalize consensus gene structure,  
538 three predictions (weight = 1) were combined and subsequently refined with  
539 EvidenceModeler (EVM) v1.1.1 (Haas *et al.*, 2008) using PASA transcript assemblies  
540 (weight = 5) and proteins from the Bergen *O. dioica* (weight = 1) aligned to the genome  
541 with Exonerate v2.2.0, yielding 16,956 protein-coding genes. To predict UTRs and  
542 alternatively spliced isoforms, the EVM models were updated using two rounds of the  
543 PASA pipeline, which resulted in a final set of 18,485 transcript models distributed among  
544 16,936 genes. Chromosomal coordinates were ported to our final assembly using the  
545 Liftoff tool (Shumate and Salzberg, 2020). The quality of the predicted gene models was  
546 assessed with BUSCO.

547 A draft annotation of the mitochondrial genome was obtained by submitting the  
548 corresponding scaffold (chr\_Un12) as input to the MITOS2 mitochondrial genome  
549 annotation server (Bernt *et al.*, 2013; accessed May 28, 2020) with the ascidian  
550 mitochondrial translation table specified (Denoëud *et al.*, 2010; Pichon *et al.*, 2019).

#### 551 **Detection of coding RNAs**

552 A translated alignment was used to detect known *O. dioica* genes available from  
553 GenBank using the TBLASTN software (Gertz *et al.*, 2006) with the options -ungapped  
554 -comp\_based\_stats F to prevent *O. dioica*'s small introns from being incorporated as  
555 alignment gaps, and -max\_intron\_length 100000 to reflect the compactness of  
556 *O. dioica*'s genome. The best hits were converted to GFF3 format using BioPerl's  
557 bp\_search2gff program (Stajich *et al.*, 2002) before being uploaded to the ZENBU  
558 genome browser (Severin *et al.*, 2014). For some closely related pairs of genes that gave  
559 ambiguous results with that method, we searched for the protein sequence in our  
560 transcriptome assembly with TBLASTN, located the genomic region where the best  
561 transcript model hit was aligned, and selected the hit from the original TBLASTN search  
562 that matched this region. We summarized our results in Suppl. Table 6. For both  
563 searches, we used an *E*-value filter of  $10^{-40}$ . Genes marked as not found in the table  
564 might be present in the genome while failing to pass the filter.

#### 565 **Detection of non-coding RNAs**

566 To validate the results of cmscan on rRNAs, genomic regions were screened with a  
567 nucleotide BLAST search using the *O. dioica* isolate MT01413 18S ribosomal RNA gene,  
568 partial sequence (GenBank:KJ193766.1). 200-kbp windows surrounding the hits where  
569 then analysed with the RNAmmer 1.2 web service (Lagesen *et al.*, 2007). RNAmmer did  
570 not detect the 5.8S RNA, but we could confirm its presence by a nucleotide BLAST search  
571 using the AF158726.1 reference sequence. The loci containing the 5S rRNA (AJ628166)  
572 and the spliced leader RNA (AJ628166) were detected with the exonerate 2.4 software  
573 (Slater and Birney, 2005), with its affine:local model and a score threshold of 1000 using  
574 the region chr1:8487589-8879731 as a query.

## 575 **Whole-genome alignments**

576 Pairs of genomes were mapped to each other with the LAST software (Kielbasa *et*  
577 *al.*, 2011) version 1066. When indexing the reference genome, we replaced the original  
578 lowercase soft masks with ones for simple repeats (`lastdb -R01`) and we selected a  
579 scoring scheme for near-identical matches (`-uNEAR`). Substitution and gap frequencies  
580 were determined with `last-train` (Hamada *et al.*, 2017), with the alignment options `-`  
581 `E0.05 -C2` and forcing symmetry with the options `--revsym --matsym --gapsym`. An  
582 optimal set of pairwise one-to-one alignments was then calculated using `last-split`  
583 (Frith and Kawaguchi, 2015). For visualization of the results, we converted the alignments  
584 to GFF3 format and collated the colinear "match\_part" alignment blocks in "match"  
585 regions using LAST's command `maf-convert -J 200000`. We then collated syntenic  
586 region blocks (sequence ontology term SO:0005858) that map to the same sequence  
587 landmark (chromosome, scaffold, contigs) on the query genome with a distance of less  
588 than 500,000 bp with the custom script `syntenic_regions.sh` (supplementary Git  
589 repository). In contrast to the "match" regions, the syntenic ones are not necessarily  
590 colinear and can overlap with each other. The GFF3 file was then uploaded to the ZENBU  
591 genome browser.

## 592 **Nanopore read realignments**

593 Nanopore reads were realigned to the genome with the LAST software as in the whole-  
594 genome alignments above. FASTQ qualities were discarded with the option `-Q0` of  
595 `lastal`. Optimal split alignments were calculated with `last-split`. Alignment blocks  
596 belonging to the same read were joined with `maf-convert -J 1e6` and the custom script  
597 `syntenic_regions_stranded.sh`. The resulting GFF3 files were loaded in the ZENBU  
598 genome browser to visualize the alignments near gap regions in order to check for reads  
599 spanning the gaps.

## 600 **Analysis of sequence properties across chromosome-scale scaffolds**

601 Each chromosome-scale scaffold was separated into windows of 50 Kbp and evaluated  
602 for GC content, repeat content, sequencing depth, and the presence of DpnII restriction  
603 sites. For chr 1, chr 2, and the PAR, windows corresponding to long and short  
604 chromosome arms were separated based on their positioning relative to a central gap  
605 region (chr 1 short arm: 1-5,191,657 bp, chr 1 long arm: 5,192,156-14,533,022 bp; chr 2  
606 short arm: 1-5,707,009, chr 2 long arm: 5,707,508-16,158,756 bp; PAR short arm: 1-  
607 6,029,625 bp, PAR long arm: 6,030,124-17,092,476). Since none of our assemblies or  
608 sequencing reads spanned both the PAR and either sex-specific chromosome, the X and  
609 Y chromosomes were excluded from this analysis. For each of GC content, sequencing  
610 depth, repeat content, gene count, and DpnII restriction sites, the significance of the  
611 differences between long and short arms was assessed with Welch's two-sided T test as  
612 well as a nonparametric Mann-Whitney test implemented in R (Suppl. Table 3). The  
613 results of the two tests were largely in agreement, but groups were only indicated as  
614 significantly different if they both produced significance values below 0.05 ( $p < 0.05$ ).



615 **Data access**

616 Sequence data was deposited to the ENA database (study ID PRJEB40135). Genome  
617 assembly and annotation were deposited to the NCBI (Accession number pending) and  
618 to Zenodo (DOI 10.5281/zenodo.4023777).

619 Custom scripts used in this study are available in GitHub  
620 (<https://github.com/oist/oikGenomePaper>).

621

622 **Acknowledgements**

623 We would like to thank the DNA Sequencing Section and the Scientific Computing and  
624 Data Analysis Section of the Research Support Division at OIST for their support, Danny  
625 Miller for advices on Nanopore sequencing, Dan Rokhsar, Gene Myers, Ferdinand  
626 Marlétaz and Konstantin Khalturin for critical comments, Takeshi Onuma and Hiroki  
627 Nishida for sharing the OSKA2016 genome sequence prior publication, and Simon  
628 Henriet for sharing a DNA extraction protocol. MJM received funding as an International  
629 Research Fellow of the Japan Society for the Promotion of Science. This work was  
630 supported by core funding from OIST.

631 **Author contributions**

632 Conceptualization: AB, CP, NML; data curation: AB, MJM, CP; formal analysis: AB, MJM,  
633 CW, TR, HCC, SK, JP, CP; investigation: AB, AM, MJM, YKT, AWL, CP;  
634 methodology: AB, CP; project administration: AB, CP; software: MJM, CW;  
635 supervision: CP, NML; validation: AB; visualization: AB, AM, MJM, YKT; writing – original  
636 draft: AB, AM, MJM, YKT, CP; writing – review & editing: AB, MJM, CP, NML.

637

638 **List of abbreviations**

639 chr 1: autosomal chromosome 1; chr 2: autosomal chromosome 2; Kbp: Kilobase pairs;  
640 LGs: linkage groups; Mbp: Megabase pairs; PAR: pseudo-autosomal regions; XSR: X-  
641 specific region; YSR: Y-specific region.

642

643 **Conflict of interests**

644 The authors declare that they have no competing interests.

645

646

647

648

## 649 References

- 650 1. Alldredge AL. Discarded appendicularian houses as sources of food, surface  
651 habitats, and particulate organic matter in planktonic environments. *Limnology and*  
652 *Oceanography*. 1976;21(1):14-24.
- 653 2. Hopcroft RR, Roff JC. Zooplankton growth rates: extraordinary production by the  
654 larvacean *Oikopleura dioica* in tropical waters. *Journal of Plankton Research*.  
655 1995;17(2):205-20.
- 656 3. Sato R, Tanaka Y, Ishimaru T. House production by *Oikopleura dioica* (Tunicata,  
657 Appendicularia) under laboratory conditions. *Journal of plankton research*.  
658 2001;23(4):415-23.
- 659 4. Alldredge, A. The contribution of discarded appendicularian houses to the flux of  
660 particulate organic carbon from oceanic surface waters. In: Gorsky, G.,  
661 Youngbluth, M. J., Deibel, D., editors. *Response of Marine Ecosystems to Global*  
662 *Change: Ecological Impact of Appendicularians*. Contemporary Publishing  
663 International; 2005. p.309-326.
- 664 5. Masunaga A, Liu AW, Tan Y, Scott A, Luscombe NM. Streamlined sampling and  
665 cultivation of the pelagic cosmopolitan larvacean, *Oikopleura dioica*. *JoVE (Journal*  
666 *of Visualized Experiments)*. 2020;16(160):e61279.
- 667 6. Fenaux, R. Anatomy and functional morphology of the Appendicularia. In: Bone,  
668 Q., editor. *The biology of pelagic tunicates*. Oxford University Press; 1998. P.25-  
669 34.
- 670 7. Delsuc F, Brinkmann H, Chourrout D, Philippe H. Tunicates and not  
671 cephalochordates are the closest living relatives of vertebrates. *Nature*.  
672 2006;439(7079):965-8.
- 673 8. Seo HC, Kube M, Edvardsen RB, Jensen MF, Beck A, Spriet E, Gorsky G,  
674 Thompson EM, Lehrach H, Reinhardt R, Chourrout D. Miniature genome in the  
675 marine chordate *Oikopleura dioica*. *Science*. 2001;294(5551):2506.
- 676 9. Denoeud F, Henriët S, Mungpakdee S, Aury JM, Da Silva C, Brinkmann H,  
677 Mikhaleva J, Olsen LC, Jubin C, Cañestro C, Bouquet JM. Plasticity of animal  
678 genome architecture unmasked by rapid evolution of a pelagic tunicate. *Science*.  
679 2010;330(6009):1381-5.
- 680 10. Naville M, Henriët S, Warren I, Sumic S, Reeve M, Volf JN, Chourrout D. Massive  
681 changes of genome size driven by expansions of non-autonomous transposable  
682 elements. *Current Biology*. 2019;29(7):1161-8.
- 683 11. Fredriksson G, Olsson R. The subchordal cells of *Oikopleura dioica* and *O.*  
684 *albicans* (Appendicularia, Chordata). *Acta Zoologica*. 1991;72(4):251-6.
- 685 12. Wang K, Omotezako T, Kishi K, Nishida H, Onuma TA. Maternal and zygotic  
686 transcriptomes in the appendicularian, *Oikopleura dioica*: novel protein-encoding  
687 genes, intra-species sequence variations, and trans-spliced RNA leader.  
688 *Development Genes and Evolution*. 2015;225(3):149-59.
- 689 13. Wang K, Tomura R, Chen W, Kiyooka M, Ishizaki H, Aizu T, Minakuchi Y, Seki M,  
690 Suzuki Y, Omotezako T, Suyama R. A genome database for a Japanese

- 691 population of the larvacean *Oikopleura dioica*. Development, Growth &  
692 Differentiation. 2020;62(6):450-61.
- 693 14. Körner WF. Untersuchungen über die gehäusebildung bei appendicularien  
694 (*Oikopleura dioica* fol). Zeitschrift für Morphologie und Ökologie der Tiere.  
695 1952;41(1):1-53.
- 696 15. Colombera D, Fenaux R. Chromosome form and number in the Larvacea. Italian  
697 Journal of Zoology. 1973;40(3-4):347-53.
- 698 16. Liu AW, Tan Y, Masunaga A, Plessy C, Luscombe NM. Centromere-specific  
699 antibody-mediated karyotyping of Okinawan *Oikopleura dioica* suggests the  
700 presence of three chromosomes. bioRxiv. 2020; doi:10.1101/2020.06.23.166173.
- 701 17. Lieberman-Aiden E, Van Berkum NL, Williams L, Imakaev M, Ragoczy T, Telling  
702 A, Amit I, Lajoie BR, Sabo PJ, Dorschner MO, Sandstrom R. Comprehensive  
703 mapping of long-range interactions reveals folding principles of the human  
704 genome. science. 2009;326(5950):289-93.
- 705 18. Dudchenko O, Batra SS, Omer AD, Nyquist SK, Hoeger M, Durand NC, Shamim  
706 MS, Machol I, Lander ES, Aiden AP, Aiden EL. De novo assembly of the *Aedes*  
707 *aegypti* genome using Hi-C yields chromosome-length scaffolds. Science.  
708 2017;356(6333):92-5.
- 709 19. Koren S, Walenz BP, Berlin K, Miller JR, Bergman NH, Phillippy AM. Canu:  
710 scalable and accurate long-read assembly via adaptive k-mer weighting and  
711 repeat separation. Genome research. 2017;27(5):722-36.
- 712 20. Melters DP, Bradnam KR, Young HA, Telis N, May MR, Ruby JG, Sebra R, Peluso  
713 P, Eid J, Rank D, Garcia JF. Comparative analysis of tandem repeats from  
714 hundreds of species reveals unique insights into centromere evolution. Genome  
715 biology. 2013;14(1):1-20.
- 716 21. Simão FA, Waterhouse RM, Ioannidis P, Kriventseva EV, Zdobnov EM. BUSCO:  
717 assessing genome assembly and annotation completeness with single-copy  
718 orthologs. Bioinformatics. 2015;31(19):3210-2.
- 719 22. Waterhouse RM, Seppey M, Simão FA, Manni M, Ioannidis P, Klioutchnikov G,  
720 Kriventseva EV, Zdobnov EM. BUSCO applications from quality assessments to  
721 gene prediction and phylogenomics. Molecular biology and evolution.  
722 2018;35(3):543-8.
- 723 23. Zdobnov EM, Tegenfeldt F, Kuznetsov D, Waterhouse RM, Simao FA, Ioannidis  
724 P, Seppey M, Loetscher A, Kriventseva EV. OrthoDB v9. 1: cataloging evolutionary  
725 and functional annotations for animal, fungal, plant, archaeal, bacterial and viral  
726 orthologs. Nucleic acids research. 2017;45(D1):D744-9.
- 727 24. Hoff KJ, Stanke M. Predicting genes in single genomes with augustus. Current  
728 protocols in bioinformatics. 2019;65(1):e57.
- 729 25. Satou Y, Nakamura R, Yu D, Yoshida R, Hamada M, Fujie M, Hisata K, Takeda  
730 H, Satoh N. A nearly complete genome of *Ciona intestinalis* Type A (*C. robusta*)  
731 reveals the contribution of inversion to chromosomal evolution in the genus *Ciona*.  
732 Genome biology and evolution. 2019;11(11):3144-57.

- 733 26. Blanchoud S, Rutherford K, Zondag L, Gemmell NJ, Wilson MJ. De novo draft  
734 assembly of the *Botrylloides leachii* genome provides further insight into tunicate  
735 evolution. *Scientific reports*. 2018;8(1):1-8.
- 736 27. Žárský V, Tachezy J. Evolutionary loss of peroxisomes—not limited to parasites.  
737 *Biology direct*. 2015;10(1):1-0.
- 738 28. Kienle N, Kloepper TH, Fasshauer D. Shedding light on the expansion and  
739 diversification of the Cdc48 protein family during the rise of the eukaryotic cell.  
740 *BMC evolutionary biology*. 2016; 16(1):215.
- 741 29. Berná L, D’Onofrio G, Alvarez-Valin F. Peculiar patterns of amino acid substitution  
742 and conservation in the fast evolving tunicate *Oikopleura dioica*. *Molecular*  
743 *phylogenetics and evolution*. 2012;62(2):708-17.
- 744 30. Berná L, Alvarez-Valin F. Evolutionary volatile Cysteines and protein disorder in  
745 the fast evolving tunicate *Oikopleura dioica*. *Marine genomics*.2015; 24:47-54.
- 746 31. Ganot P, Kallesøe T, Reinhardt R, Chourrout D, Thompson EM. Spliced-leader  
747 RNA trans splicing in a chordate, *Oikopleura dioica*, with a compact genome.  
748 *Molecular and cellular biology*. 2004;24(17):7795-805.
- 749 32. Pichon J, Luscombe NM, Plessy C. Widespread use of the “ascidian” mitochondrial  
750 genetic code in tunicates. *F1000Research*. 2019;8.
- 751 33. Kolmogorov M, Yuan J, Lin Y, Pevzner PA. Assembly of long, error-prone reads  
752 using repeat graphs. *Nature biotechnology*. 2019;37(5):540-6.
- 753 34. *Drosophila* 12 Genomes Consortium. Evolution of genes and genomes on the  
754 *Drosophila* phylogeny. *Nature*. 2007;450(7167):203.
- 755 35. Simakov O, Marlétaz F, Yue JX, O’Connell B, Jenkins J, Brandt A, Calef R, Tung  
756 CH, Huang TK, Schmutz J, Satoh N. Deeply conserved synteny resolves early  
757 events in vertebrate evolution. *Nature Ecology & Evolution*. 2020;20:1-11.
- 758 36. Schaeffer SW. Muller “Elements” in *Drosophila*: how the search for the genetic  
759 basis for speciation led to the birth of comparative genomics. *Genetics*.  
760 2018;210(1):3-13.
- 761 37. Shoguchi E, Kawashima T, Nishida-Umehara C, Matsuda Y, Satoh N. Molecular  
762 cytogenetic characterization of *Ciona intestinalis* chromosomes. *Zoological*  
763 *science*. 2005;22(5):511-6.
- 764 38. Ganot P, Thompson EM. Patterning through differential endoreduplication in  
765 epithelial organogenesis of the chordate, *Oikopleura dioica*. *Developmental*  
766 *biology*. 2002;252(1):59-71.
- 767 39. Severin J, Lizio M, Harshbarger J, Kawaji H, Daub CO, Hayashizaki Y, Bertin N,  
768 Forrest AR. Interactive visualization and analysis of large-scale sequencing  
769 datasets using ZENBU. *Nature biotechnology*. 2014;32(3):217-9.
- 770 40. Seo HC, Edvardsen RB, Maeland AD, Bjordal M, Jensen MF, Hansen A, Flaatt M,  
771 Weissenbach J, Lehrach H, Wincker P, Reinhardt R. Hox cluster disintegration  
772 with persistent anteroposterior order of expression in *Oikopleura dioica*. *Nature*.  
773 2004;431(7004):67-71.
- 774 41. Marçais G, Kingsford C. A fast, lock-free approach for efficient parallel counting of  
775 occurrences of k-mers. *Bioinformatics*. 2011;27(6):764-70.

- 776 42. Andrews S. FastQC: a quality control tool for high throughput sequence data.  
777 2010.
- 778 43. Vaser R, Sović I, Nagarajan N, Šikić M. Fast and accurate de novo genome  
779 assembly from long uncorrected reads. *Genome research*. 2017;27(5):737-46.
- 780 44. Walker BJ, Abeel T, Shea T, Priest M, Abouelliel A, Sakthikumar S, Cuomo CA,  
781 Zeng Q, Wortman J, Young SK, Earl AM. Pilon: an integrated tool for  
782 comprehensive microbial variant detection and genome assembly improvement.  
783 *PloS one*. 2014;9(11):e112963.
- 784 45. Li H. Aligning sequence reads, clone sequences and assembly contigs with BWA-  
785 MEM. arXiv preprint arXiv:1303.3997. 2013.
- 786 46. Huang S, Kang M, Xu A. HaploMerger2: rebuilding both haploid sub-assemblies  
787 from high-heterozygosity diploid genome assembly. *Bioinformatics*.  
788 2017;33(16):2577-9.
- 789 47. Durand NC, Shamim MS, Machol I, Rao SS, Huntley MH, Lander ES, Aiden EL.  
790 Juicer provides a one-click system for analyzing loop-resolution Hi-C experiments.  
791 *Cell systems*. 2016;3(1):95-8.
- 792 48. Durand NC, Robinson JT, Shamim MS, Machol I, Mesirov JP, Lander ES, Aiden  
793 EL. Juicebox provides a visualization system for Hi-C contact maps with unlimited  
794 zoom. *Cell systems*. 2016;3(1):99-101.
- 795 49. Kielbasa SM, Wan R, Sato K, Horton P, Frith MC. Adaptive seeds tame genomic  
796 sequence comparison. *Genome research*. 2011;21(3):487-93.
- 797 50. Gurevich A, Saveliev V, Vyahhi N, Tesler G. QUAST: quality assessment tool for  
798 genome assemblies. *Bioinformatics*. 2013;29(8):1072-5.
- 799 51. Han Y, Wessler SR. MITE-Hunter: a program for discovering miniature inverted-  
800 repeat transposable elements from genomic sequences. *Nucleic acids research*.  
801 2010;38(22):e199.
- 802 52. Wenke T, Döbel T, Sörensen TR, Junghans H, Weisshaar B, Schmidt T. Targeted  
803 identification of short interspersed nuclear element families shows their  
804 widespread existence and extreme heterogeneity in plant genomes. *The Plant  
805 Cell*. 2011;23(9):3117-28.
- 806 53. Smit A.F.A., Hubley R. & Green P. RepeatMasker at <http://repeatmasker.org>
- 807 54. Frith MC. A new repeat-masking method enables specific detection of homologous  
808 sequences. *Nucleic acids research*. 2011;39(4):e23.
- 809 55. Olson D, Wheeler T. ULTRA: A Model Based Tool to Detect Tandem Repeats.  
810 *In Proceedings of the 2018 ACM International Conference on Bioinformatics,  
811 Computational Biology, and Health Informatics 2018* (pp. 37-46).
- 812 56. Schulmeister A, Schmid M, Thompson EM. Phosphorylation of the histone H3. 3  
813 variant in mitosis and meiosis of the urochordate *Oikopleura dioica*. *Chromosome  
814 research*. 2007;15(2):189.
- 815 57. Grabherr MG, Haas BJ, Yassour M, Levin JZ, Thompson DA, Amit I, Adiconis X,  
816 Fan L, Raychowdhury R, Zeng Q, Chen Z. Full-length transcriptome assembly  
817 from RNA-Seq data without a reference genome. *Nature biotechnology*.  
818 2011;29(7):644-52.

- 819 58. Li W, Godzik A. Cd-hit: a fast program for clustering and comparing large sets of  
820 protein or nucleotide sequences. *Bioinformatics*. 2006;22(13):1658-9.
- 821 59. Bushmanova E, Antipov D, Lapidus A, Suvorov V, Prjibelski AD. rnaQUAST: a  
822 quality assessment tool for de novo transcriptome assemblies. *Bioinformatics*.  
823 2016;32(14):2210-2.
- 824 60. Stanke M, Schöffmann O, Morgenstern B, Waack S. Gene prediction in eukaryotes  
825 with a generalized hidden Markov model that uses hints from external sources.  
826 *BMC bioinformatics*. 2006;7(1):62.
- 827 61. Cantarel BL, Korf I, Robb SM, Parra G, Ross E, Moore B, Holt C, Alvarado AS,  
828 Yandell M. MAKER: an easy-to-use annotation pipeline designed for emerging  
829 model organism genomes. *Genome research*. 2008;18(1):188-96.
- 830 62. Haas BJ, Delcher AL, Mount SM, Wortman JR, Smith Jr RK, Hannick LI, Maiti R,  
831 Ronning CM, Rusch DB, Town CD, Salzberg SL. Improving the *Arabidopsis*  
832 genome annotation using maximal transcript alignment assemblies. *Nucleic acids*  
833 *research*. 2003;31(19):5654-66.
- 834 63. Dobin A, Davis CA, Schlesinger F, Drenkow J, Zaleski C, Jha S, Batut P, Chaisson  
835 M, Gingeras TR. STAR: ultrafast universal RNA-seq aligner. *Bioinformatics*.  
836 2013;29(1):15-21.
- 837 64. Haas BJ, Salzberg SL, Zhu W, Pertea M, Allen JE, Orvis J, White O, Buell CR,  
838 Wortman JR. Automated eukaryotic gene structure annotation using  
839 EVIDENCEModeler and the Program to Assemble Spliced Alignments. *Genome*  
840 *biology*. 2008;9(1):R7.
- 841 65. Shumate A, Salzberg S. Liftoff: an accurate gene annotation mapping tool. *bioRxiv*.  
842 2020; doi:10.1101/2020.06.24.169680
- 843 66. Bernt M, Donath A, Jühling F, Externbrink F, Florentz C, Fritsch G, Pütz J,  
844 Middendorf M, Stadler PF. MITOS: improved de novo metazoan mitochondrial  
845 genome annotation. *Molecular phylogenetics and evolution*. 2013;69(2):313-9.
- 846 67. Gertz EM, Yu YK, Agarwala R, Schäffer AA, Altschul SF. Composition-based  
847 statistics and translated nucleotide searches: improving the TBLASTN module of  
848 BLAST. *BMC biology*. 2006;4(1):1-4.
- 849 68. Stajich JE, Block D, Boulez K, Brenner SE, Chervitz SA, Dagdigian C, Fuellen G,  
850 Gilbert JG, Korf I, Lapp H, Lehväslaiho H. The Bioperl toolkit: Perl modules for the  
851 life sciences. *Genome research*. 2002;12(10):1611-8.
- 852 69. Lagesen K, Hallin P, Rødland EA, Stærfeldt HH, Rognes T, Ussery DW.  
853 RNAmmer: consistent and rapid annotation of ribosomal RNA genes. *Nucleic acids*  
854 *research*. 2007;35(9):3100-8.
- 855 70. Slater GS, Birney E. Automated generation of heuristics for biological sequence  
856 comparison. *BMC bioinformatics*. 2005;6(1):31.
- 857 71. Hamada M, Ono Y, Asai K, Frith MC. Training alignment parameters for arbitrary  
858 sequencers with LAST-TRAIN. *Bioinformatics*. 2017;33(6):926-8.
- 859 72. Frith MC, Kawaguchi R. Split-alignment of genomes finds orthologies more  
860 accurately. *Genome biology*. 2015;16(1):106.

861 **Figures**

862

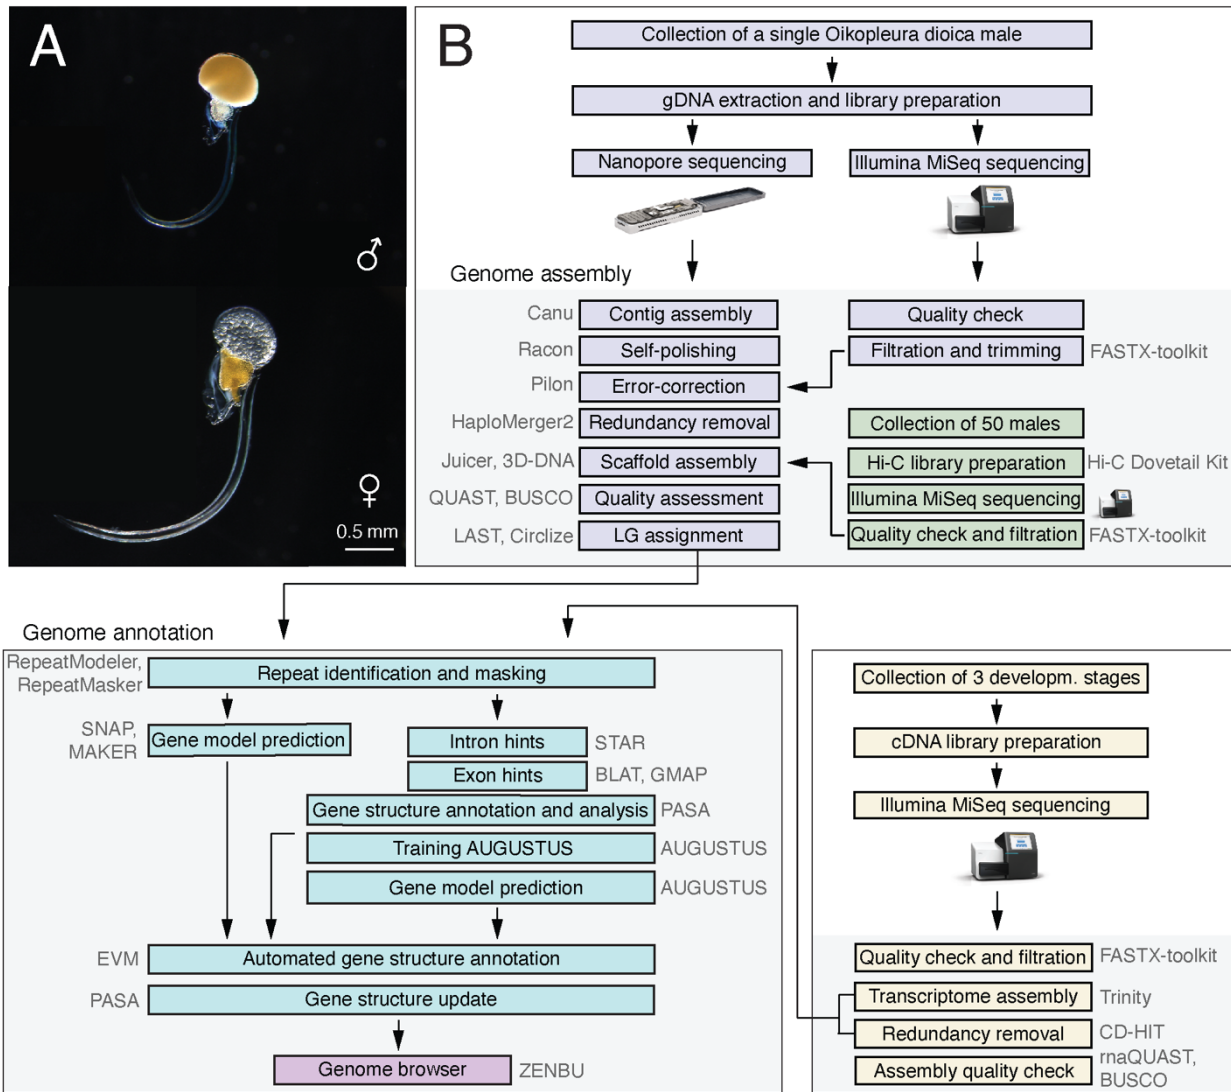

863

864 **Figure 1:** (A) Life images of adult male (top) and female (bottom) *O. dioica*. (B) Genome assembly and  
865 annotation workflow that was used to generate the OKI2018\_l69 genome assembly.

866

867

868

869

870

871

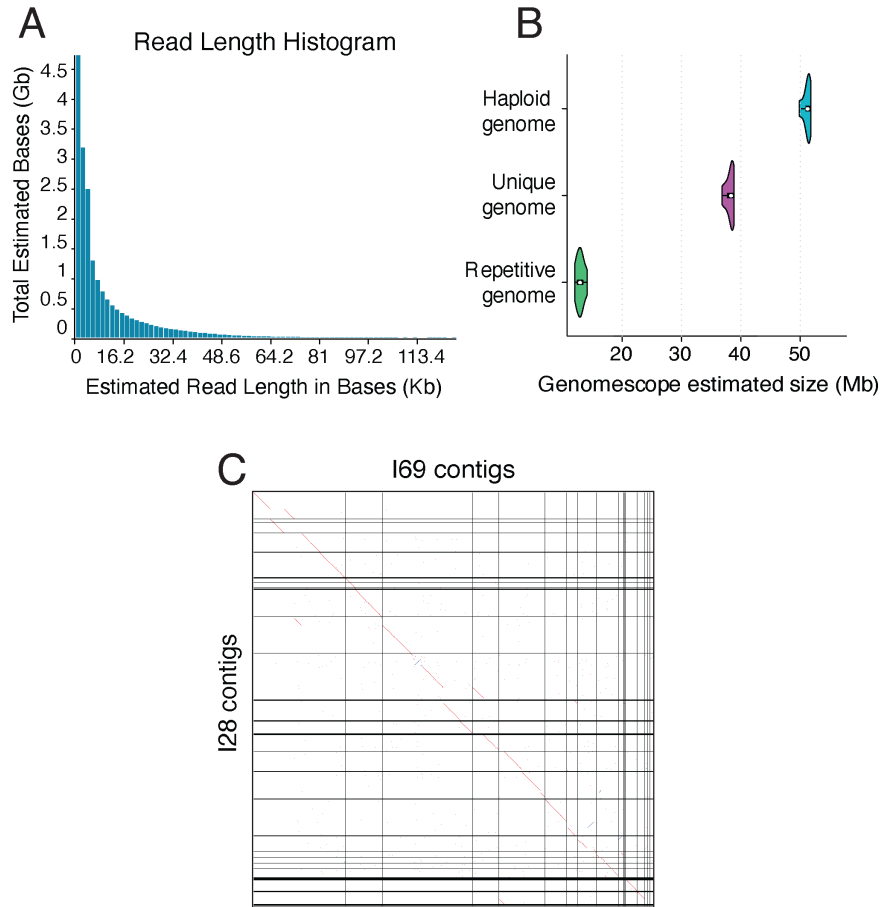

872

873 **Figure 2:** (A) Length distribution of raw Nanopore reads. (B) Estimated total and repetitive genome size  
874 based on *k*-mer counting of the Illumina paired-end reads used for assembly polishing. (C) Pairwise  
875 genome alignment of the contig assemblies of I69 and I28 *O. dioica* individuals.

876

877

878

879

880

881

882

883

884

885

886



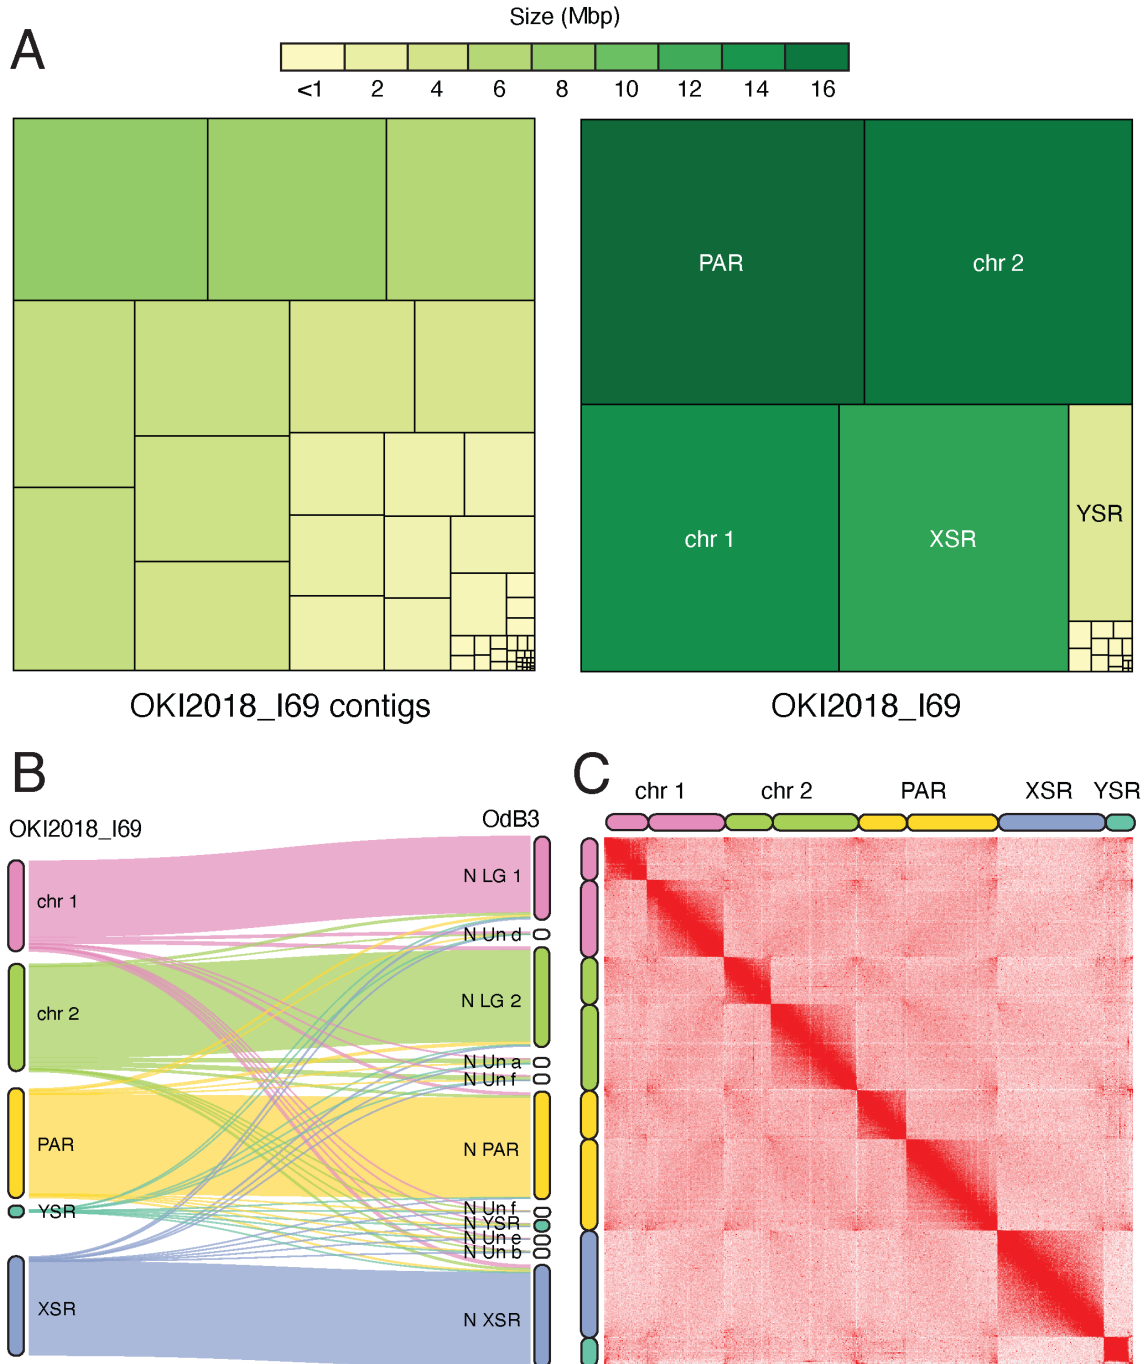

887

888 **Figure 3:** (A) Treemap comparison between the contig (left) and scaffold (right) assemblies of the *O. dioica*  
 889 genome. Each rectangle represents a contig or a scaffold in the assembly with the area proportional to its  
 890 length. (B) Comparison between the OKI2018\_I69 (left) and OdB3 (right) linkage groups. The Sankey plot  
 891 shows what proportion of each chromosome in the OKI2018\_I69 genome is aligned to the OdB3 linkage  
 892 groups. (C) Contact matrix generated by aligning Hi-C data set to the OKI2018\_I69 assembly with Juicer  
 893 and 3D-DNA pipelines. Pixel intensity in the contact matrices indicates how often a pair of loci collocate in  
 894 the nucleus.

895

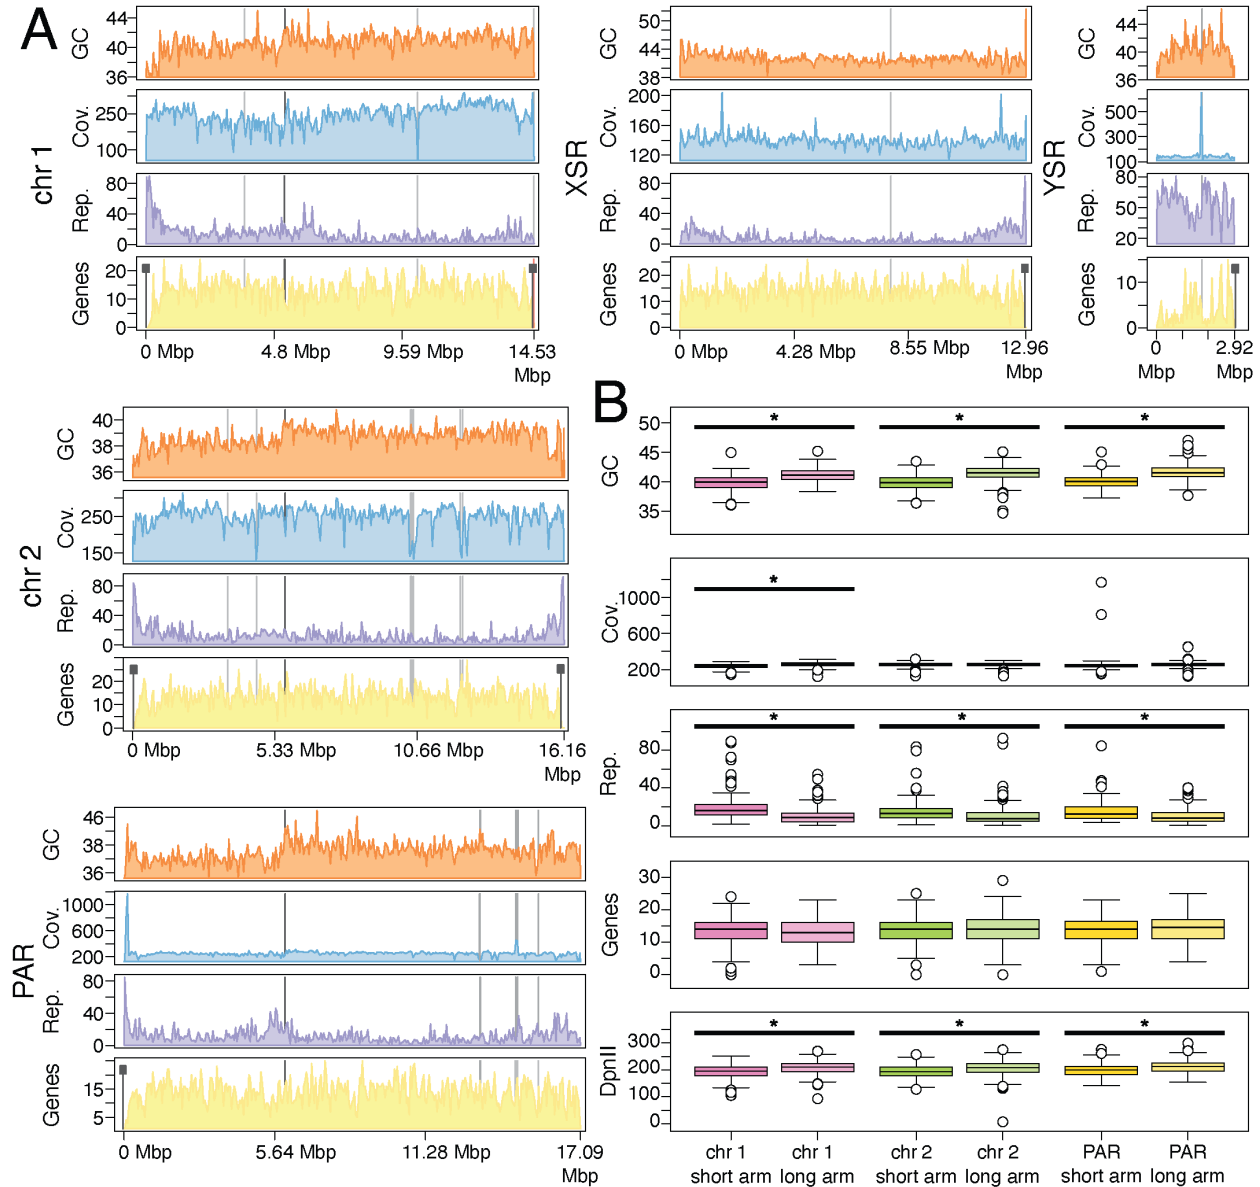

896

897 **Figure 4:** (A) Visualization of sequence properties across chromosomes in the OKI2018\_I69 assembly. For  
 898 each chromosome, 50 Kbp windows of GC (orange), Nanopore sequence coverage (blue), the percent of  
 899 nucleotides masked by RepeatMasker (purple), and the number of genes (yellow) are indicated. Differences  
 900 in these sequence properties occur near predicted sites of centromeres and telomeres, as well as between  
 901 the short and long arms of each non-sex-specific chromosome. Telomeres and gaps in the assembly are  
 902 indicated with black and grey rectangles, respectively. B) Long and short chromosome arms exhibit  
 903 significant differences sequence properties, including GC content, repetitive sequence content, and the  
 904 number of restriction sites recognized by the DpnII enzyme used to generate the Hi-C library.

905

906

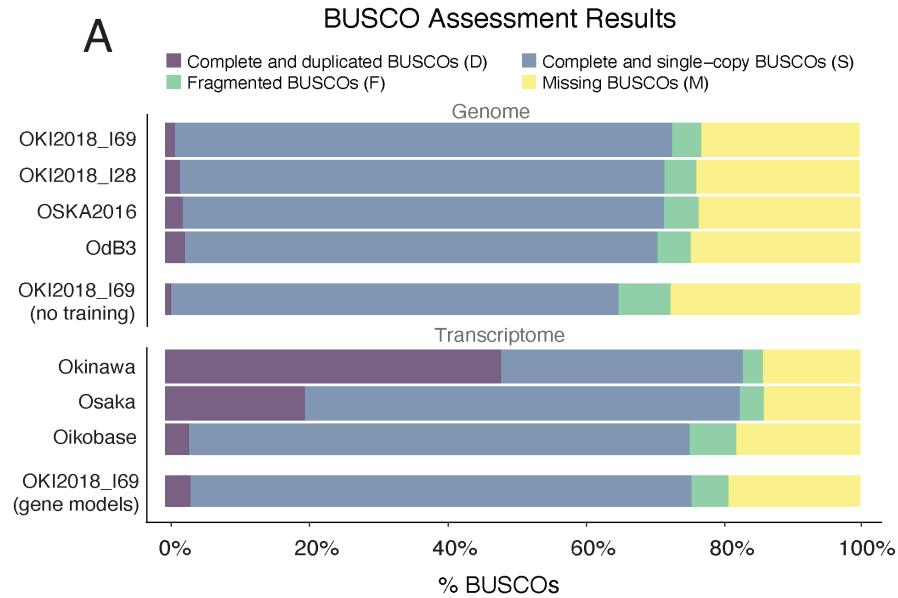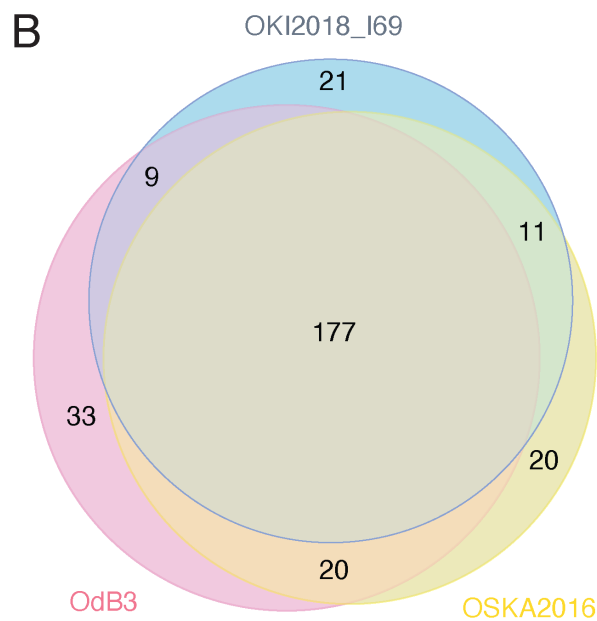

907

908 **Figure 5:** (A) Proportion of BUSCO genes detected or missed in *Oikopleura* genomes and transcriptomes.  
 909 The search on the OKI2018\_I69 assembly was repeated with default parameters (“no training”) to display  
 910 the effect of AUGUSTUS training. (B) Number of BUSCO genes missing in one or multiple reference  
 911 genomes.

912

913

914

915

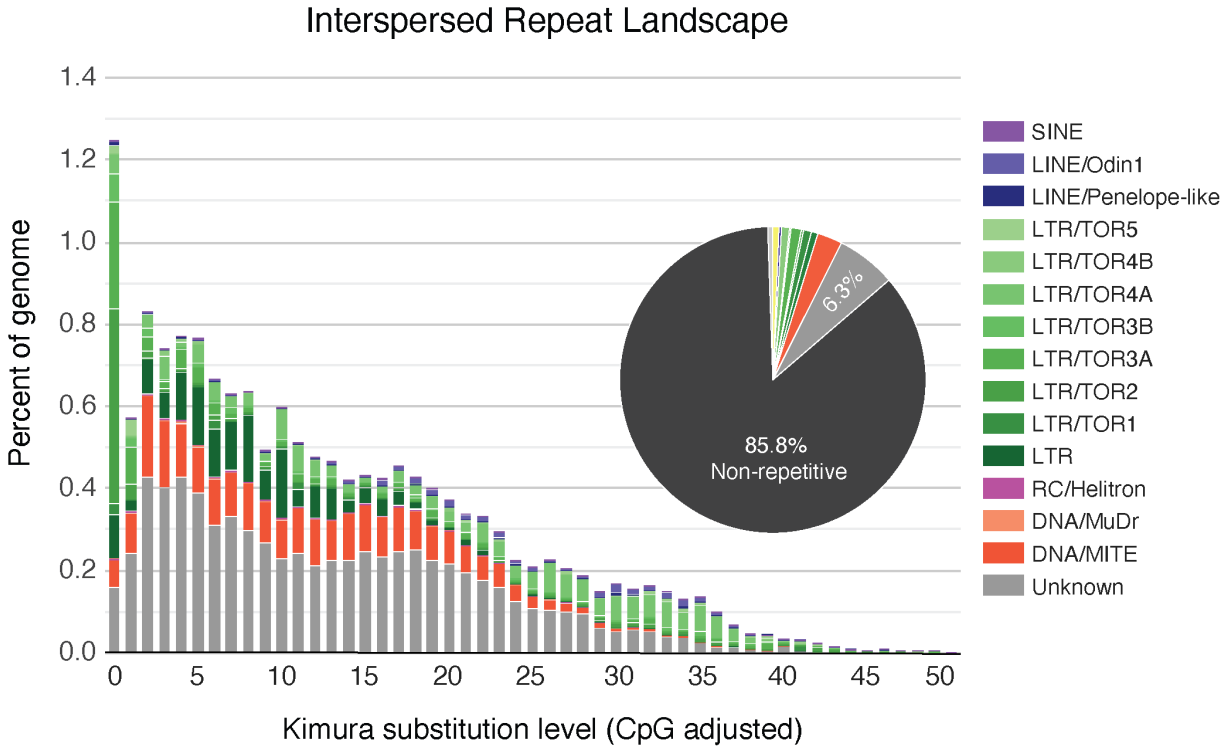

916

917 **Figure 6:** Analysis of repetitive elements. The repeat landscape and proportions of various repeat classes  
918 in the genome are indicated and color-coded according to the classes shown on the right side of the figure.  
919 The non-repetitive fraction of the genome is shown in black.

920

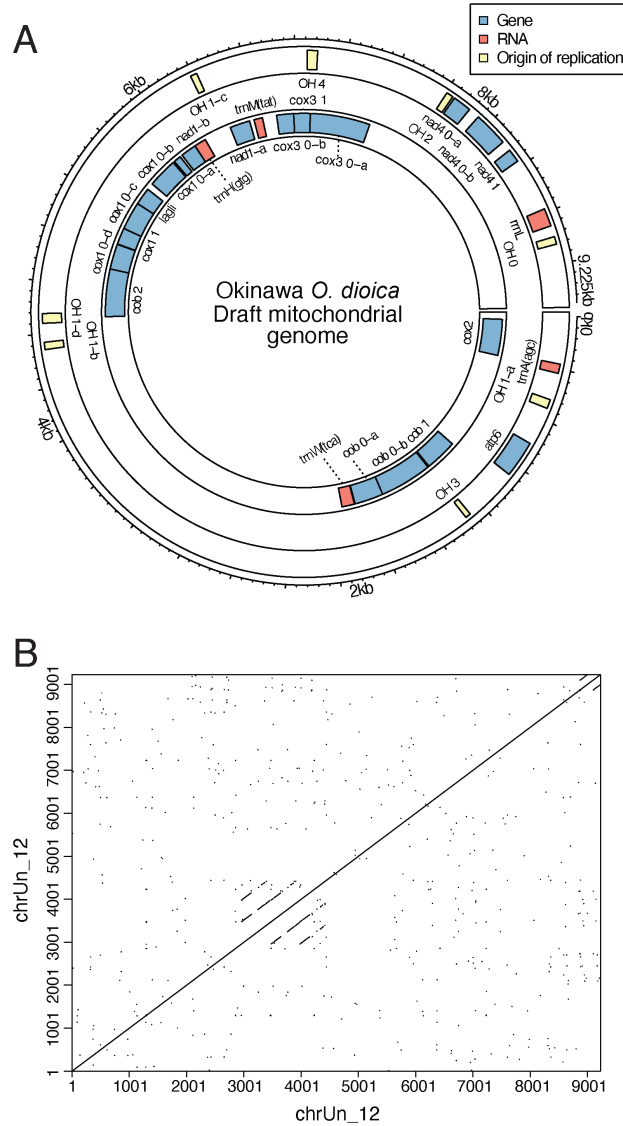

921

922 **Figure 7:** (A) Predicted gene annotation of the draft mitochondrial genome sequence. (B) Self-similarity  
923 plot of the draft mitochondrial genome sequence. A tandem repeat can be seen, which complicates the  
924 complete assembly of the mitochondrial genome from whole-genome sequencing data.

925

926

927

928

929

930

931

chr 1

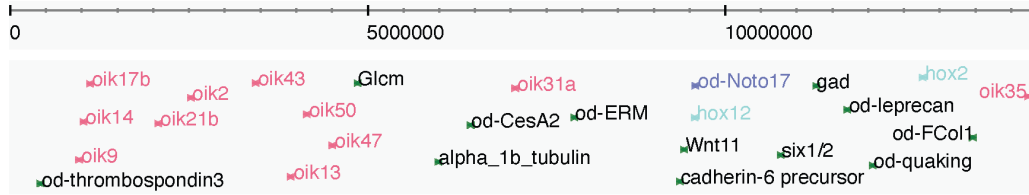

chr 2

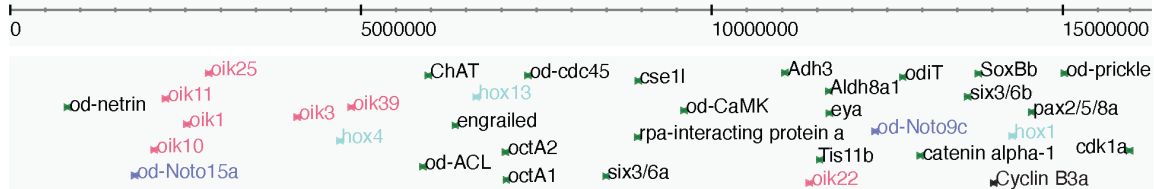

PAR

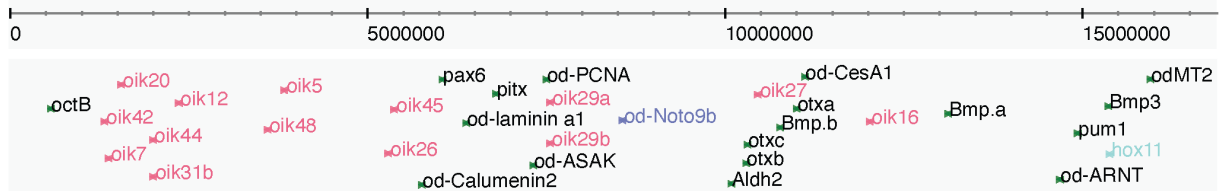

XSR

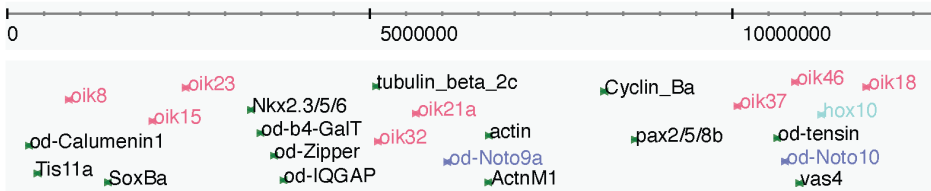

YSR

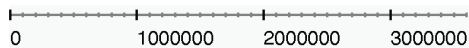

932

933 **Figure 8:** Genomic locations of various oikopleurid gene homologs searchable by name and PubMed  
934 identifiers in the ZENBU genome browser. Colours indicate genes from the same family.

935

## 936 **Supplementary materials**

937 **Supplementary Table 1:** Per-scaffold statistics

938 **Supplementary Table 2:** Contamination table

939 **Supplementary Table 3:** Statistics results for the analysis of sequence properties across chromosome-  
940 scale scaffolds

941 **Supplementary Table 4:** BUSCO scores

942 **Supplementary Table 5:** List of missing BUSCO genes in OKI2018\_I69, OdB3 and OSKA2016 genome  
943 assemblies

944 **Supplementary Table 6:** Gene list uploaded to ZENBU

945

946
